# Supplementary material for: Gene expression dysregulation domains are not a specific feature of Down syndrome
Source: PubMed Central journal article supplement (PMC6554309; doi:10.1038/s41467-019-10129-9), 2019-06-06
Supplement: 41467_2019_10129_MOESM1_ESM.pdf [file 41467_2019_10129_MOESM1_ESM.pdf]

# **Gene Expression Dysregulation Domains are not a Specific Feature of Down Syndrome**

*Ahlfors et al.*

## **Supplementary Figures**

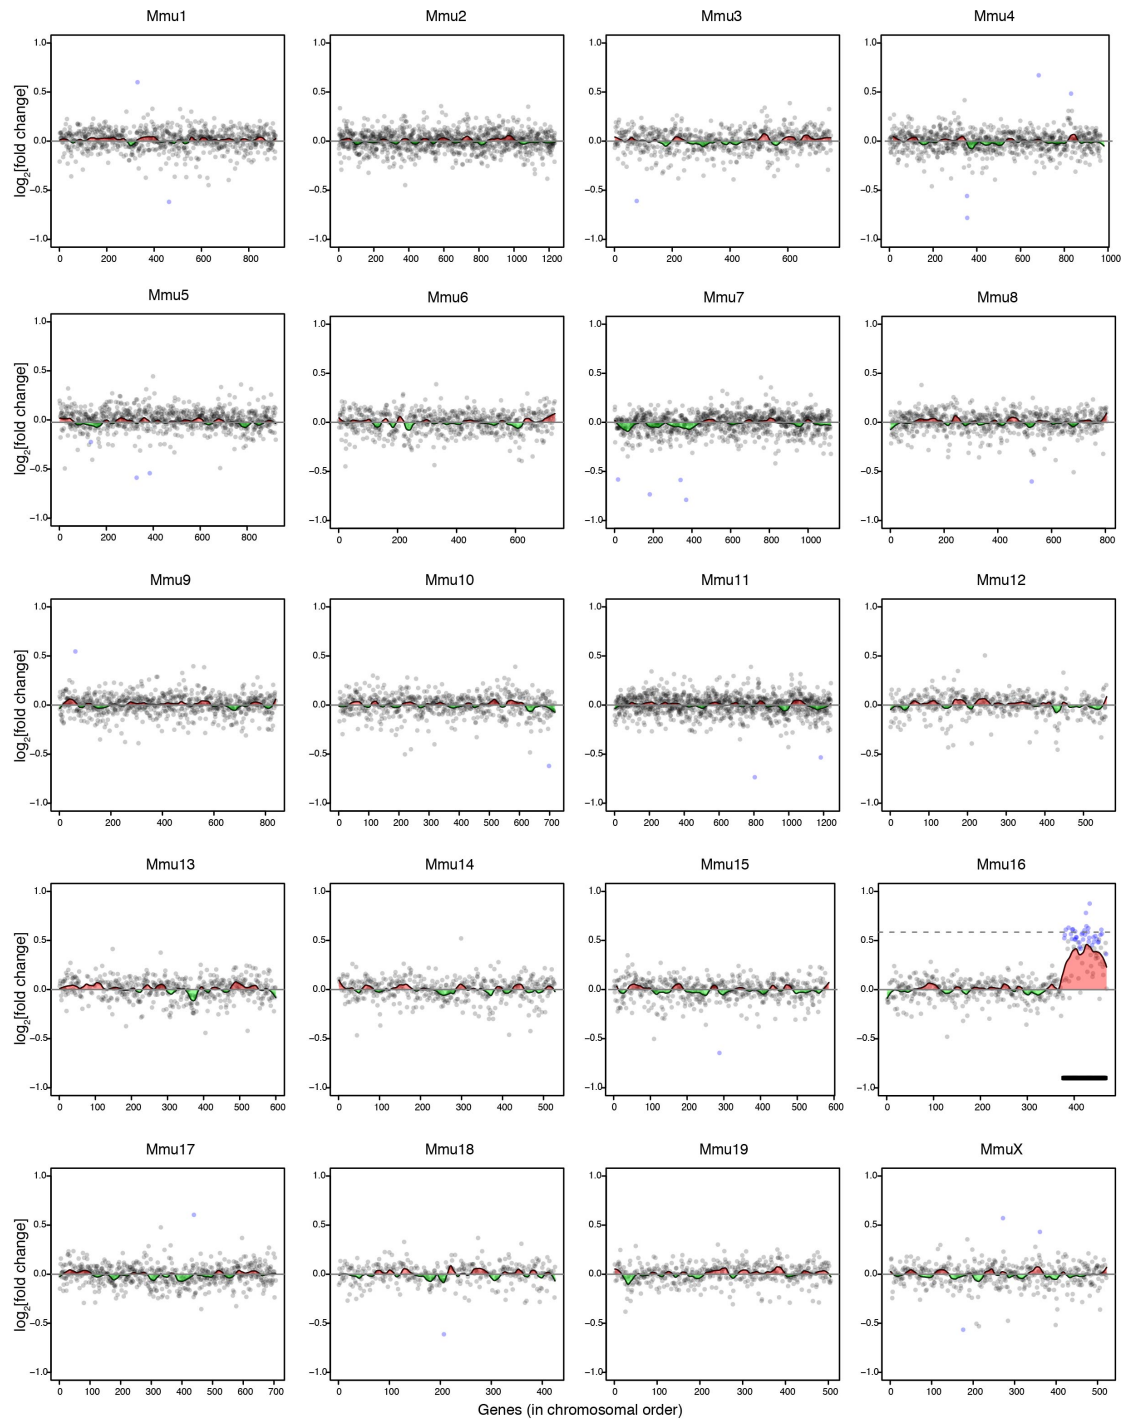

**Supplementary Figure 1.** Change in expression in Dp1Tyb MEFs as a function of chromosomal position. Plots show fold change of gene expression in Dp1Tyb MEFs v WT control cells. Expressed genes are plotted in chromosomal order. Genes that are significantly differentially expressed are indicated with blue dots, other genes are in grey. A Loess smoothing curve is superimposed with regions that are up- or down-regulated indicated in red or green. Dashed line on Mmu16 indicates a fold change of 1.5. Note the upregulation of genes in the duplicated region on Mmu16 (thick black line).

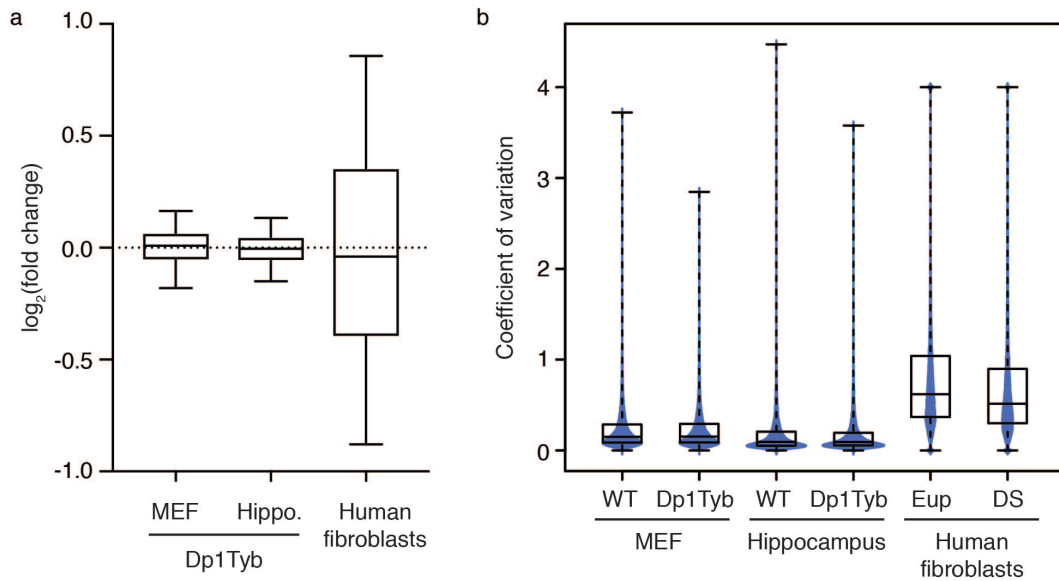

**Supplementary Figure 2.** Reduced gene expression changes and reduced variation in gene expression in Dp1Tyb MEFs and hippocampus compared to human DS fibroblasts. **a** Box and whisker plots of the distribution of fold changes in gene expression in the comparison of Dp1Tyb MEFs or hippocampus with WT controls, and in the comparison of DS and euploid human fibroblasts (data from Letourneau *et al*)<sup>3</sup>. Plots show median (black line), as well as the 25%-75% (box) and 5%-95% (whiskers) distributions. **b** Coefficient of variation (standard deviation/mean) of expression of every gene in RNAseq from WT and Dp1Tyb MEFs or hippocampus (this study) or euploid (Eup) and DS human fibroblasts (data from Letourneau *et al*)<sup>3</sup>. Plots show box (25%-75%) and whisker (0%-100%) plots superimposed on bean plots (blue) of the whole distribution.

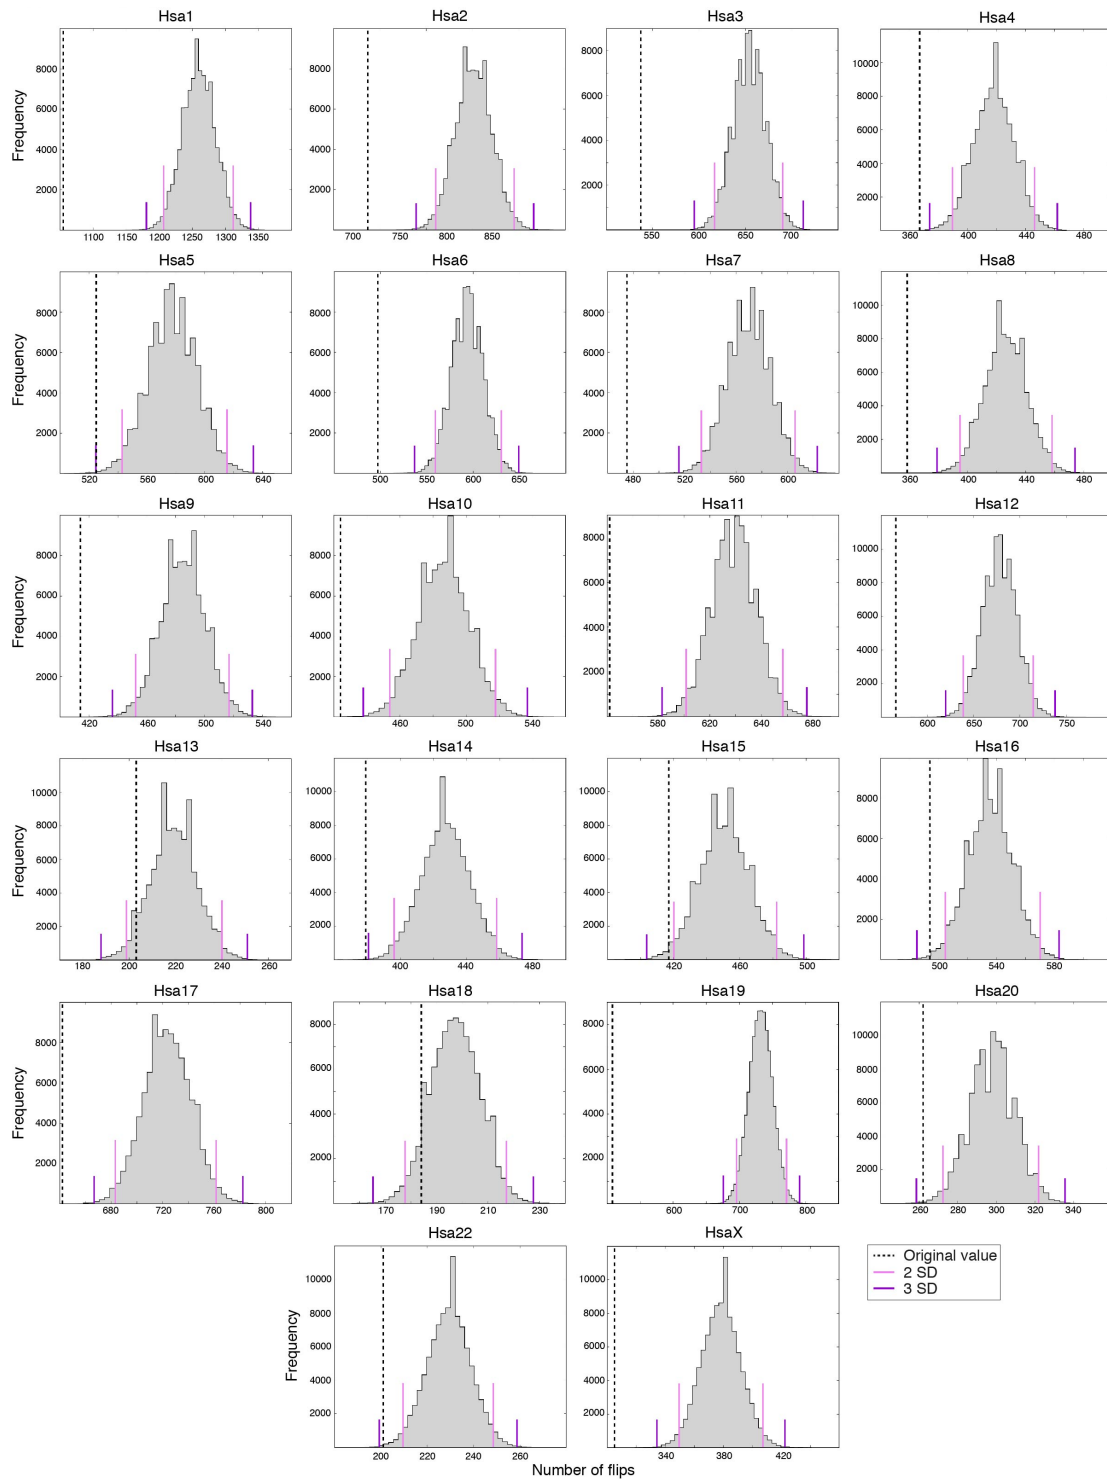

**Supplementary Figure 3.** Distribution of flips in gene expression in human DS fibroblasts<sup>3</sup>. Plots of distribution of numbers of flips in gene expression in 100,000 randomised versions of each chromosome in human DS v euploid fibroblasts. Pink and purple lines indicate 2 and 3 standard deviations (SD) away from the mean; dashed line shows the flips for the actual non-randomised chromosome.

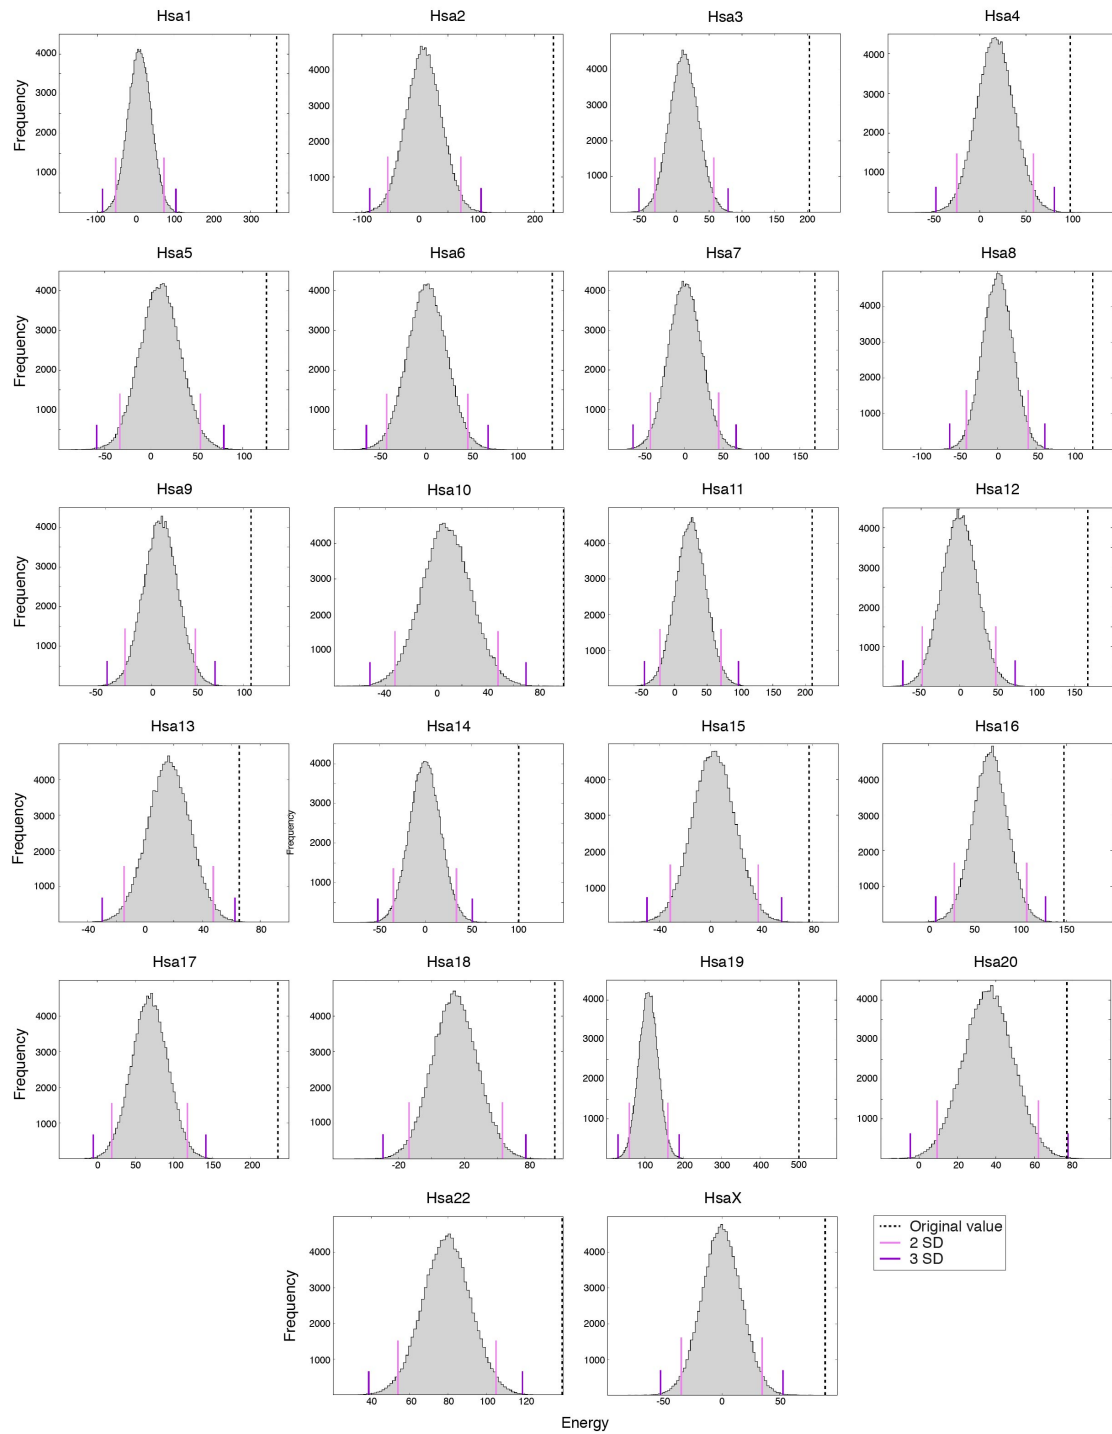

**Supplementary Figure 4.** Distribution of energy in gene expression in human DS fibroblasts<sup>3</sup>. Plots of distribution of energy in gene expression in 100,000 randomised versions of each chromosome in human DS v euploid fibroblasts. Pink and purple lines indicate 2 and 3 SD away from the mean; dashed line shows the energy for the actual non-randomised chromosome.

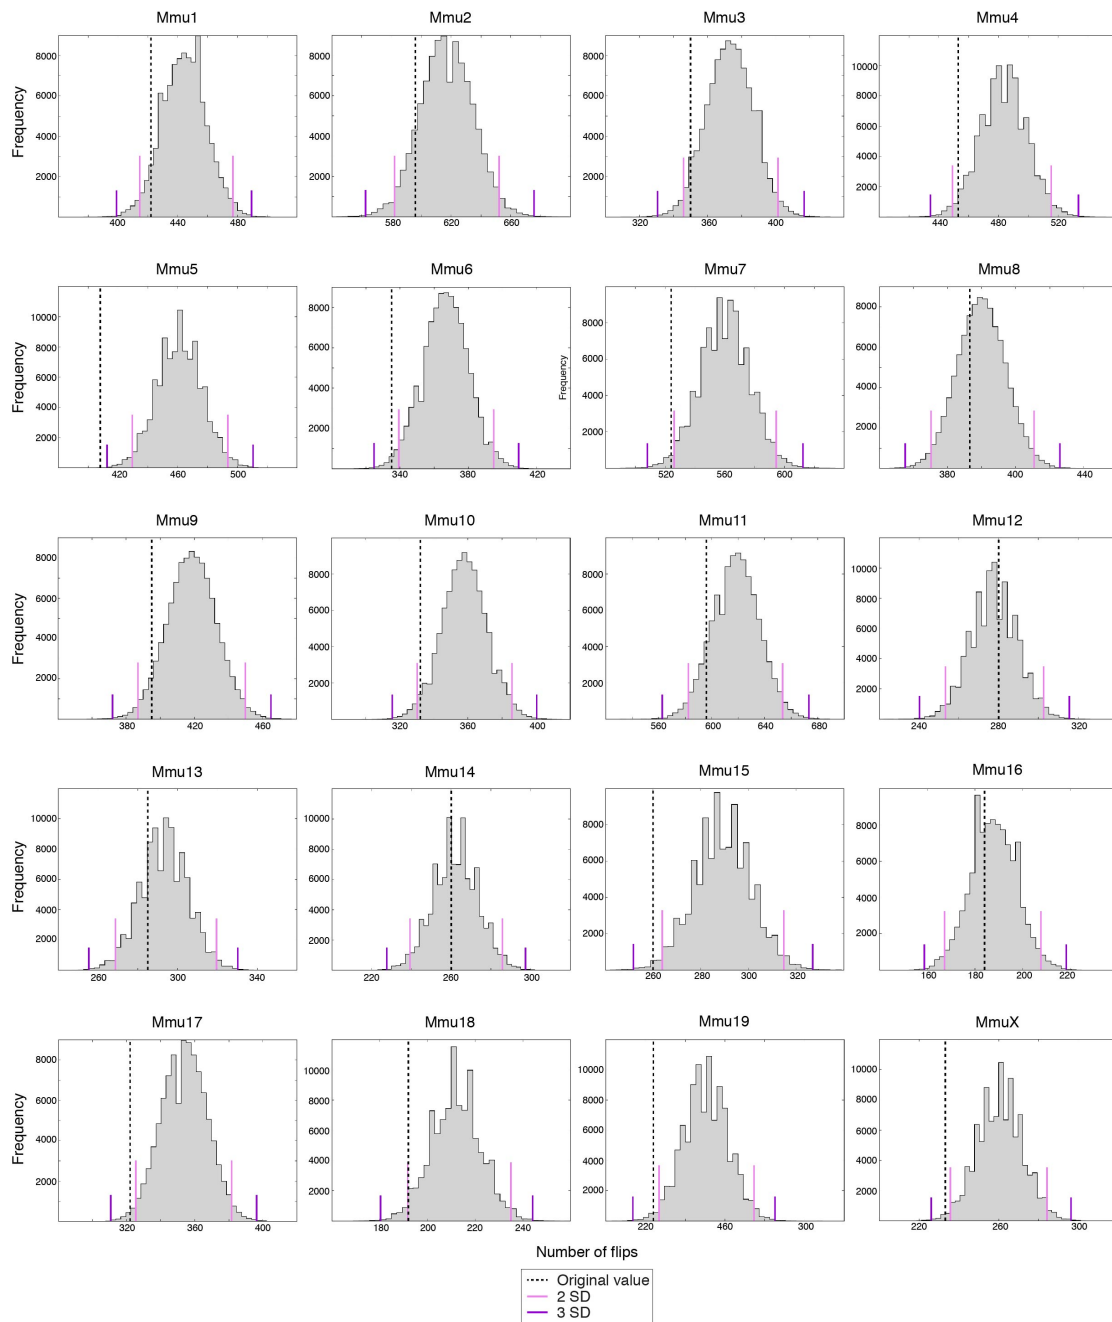

**Supplementary Figure 5.** Distribution of flips in gene expression in Dp1Tyb MEFs. Plots of distribution of numbers of flips in gene expression in 100,000 randomised versions of each chromosome in Dp1Tyb v WT MEFs. Pink and purple lines indicate 2 and 3 SD away from the mean; dashed line shows the flips for the actual non-randomised chromosome. Genes on Mmu16 that are duplicated in Dp1Tyb mice were excluded from this analysis.

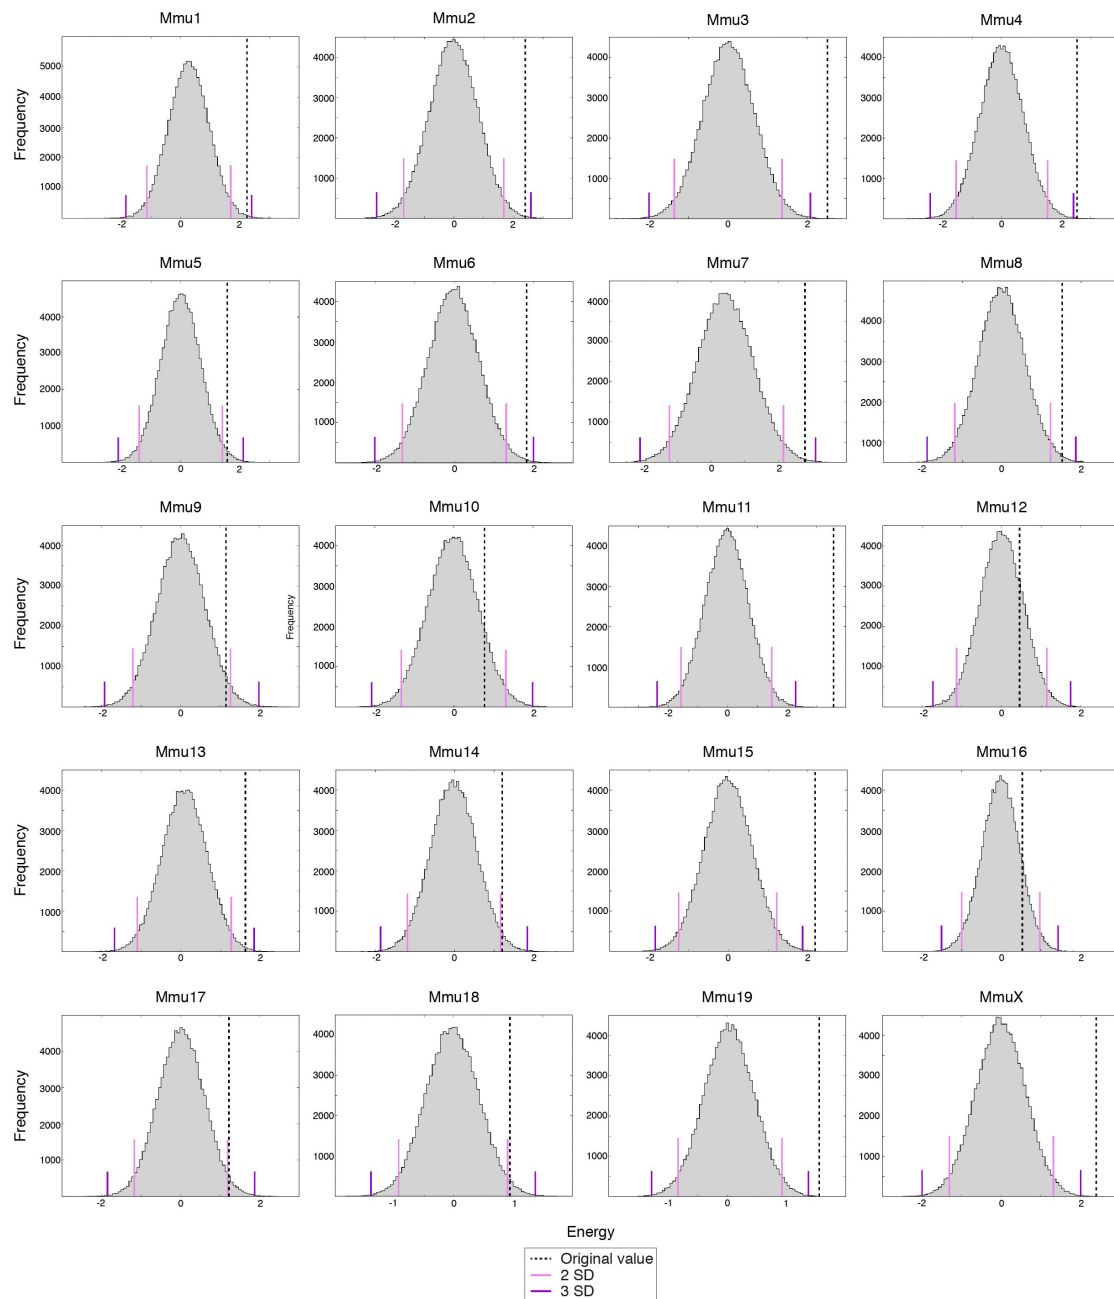

**Supplementary Figure 6.** Distribution of energy in gene expression in Dp1Tyb MEFs. Plots of distribution of energy in gene expression in 100,000 randomised versions of each chromosome in Dp1Tyb v WT MEFs. Pink and purple lines indicate 2 and 3 SD away from the mean; dashed line shows the energy for the actual non-randomised chromosome. Genes on Mmu16 that are duplicated in Dp1Tyb mice were excluded from this analysis.

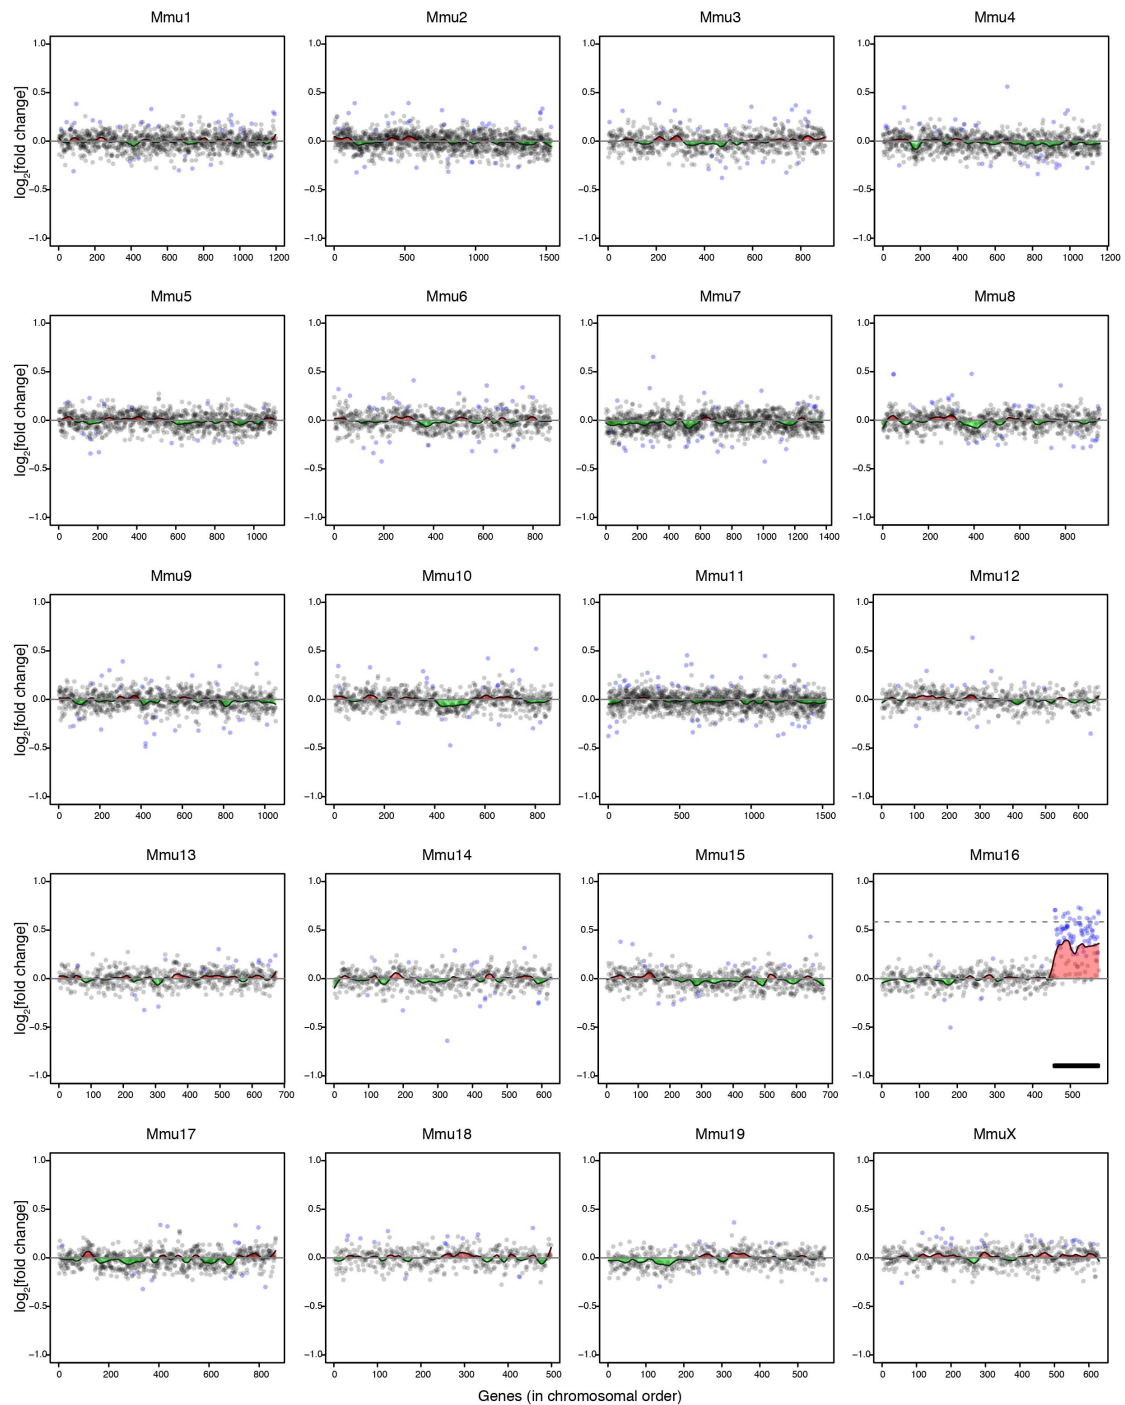

**Supplementary Figure 7.** Change in expression in Dp1Tyb hippocampus as a function of chromosomal position. Plots show fold change of gene expression in Dp1Tyb v WT hippocampus. Expressed genes are plotted in chromosomal order. Genes that are significantly differentially expressed are indicated with blue dots, other genes are in grey. A Loess smoothing curve is superimposed with regions that are up- or down-regulated indicated in red or green. Dashed line on Mmu16 indicates a 1.5 fold change. Note the upregulation of genes in the duplicated region on Mmu16 (thick black line).



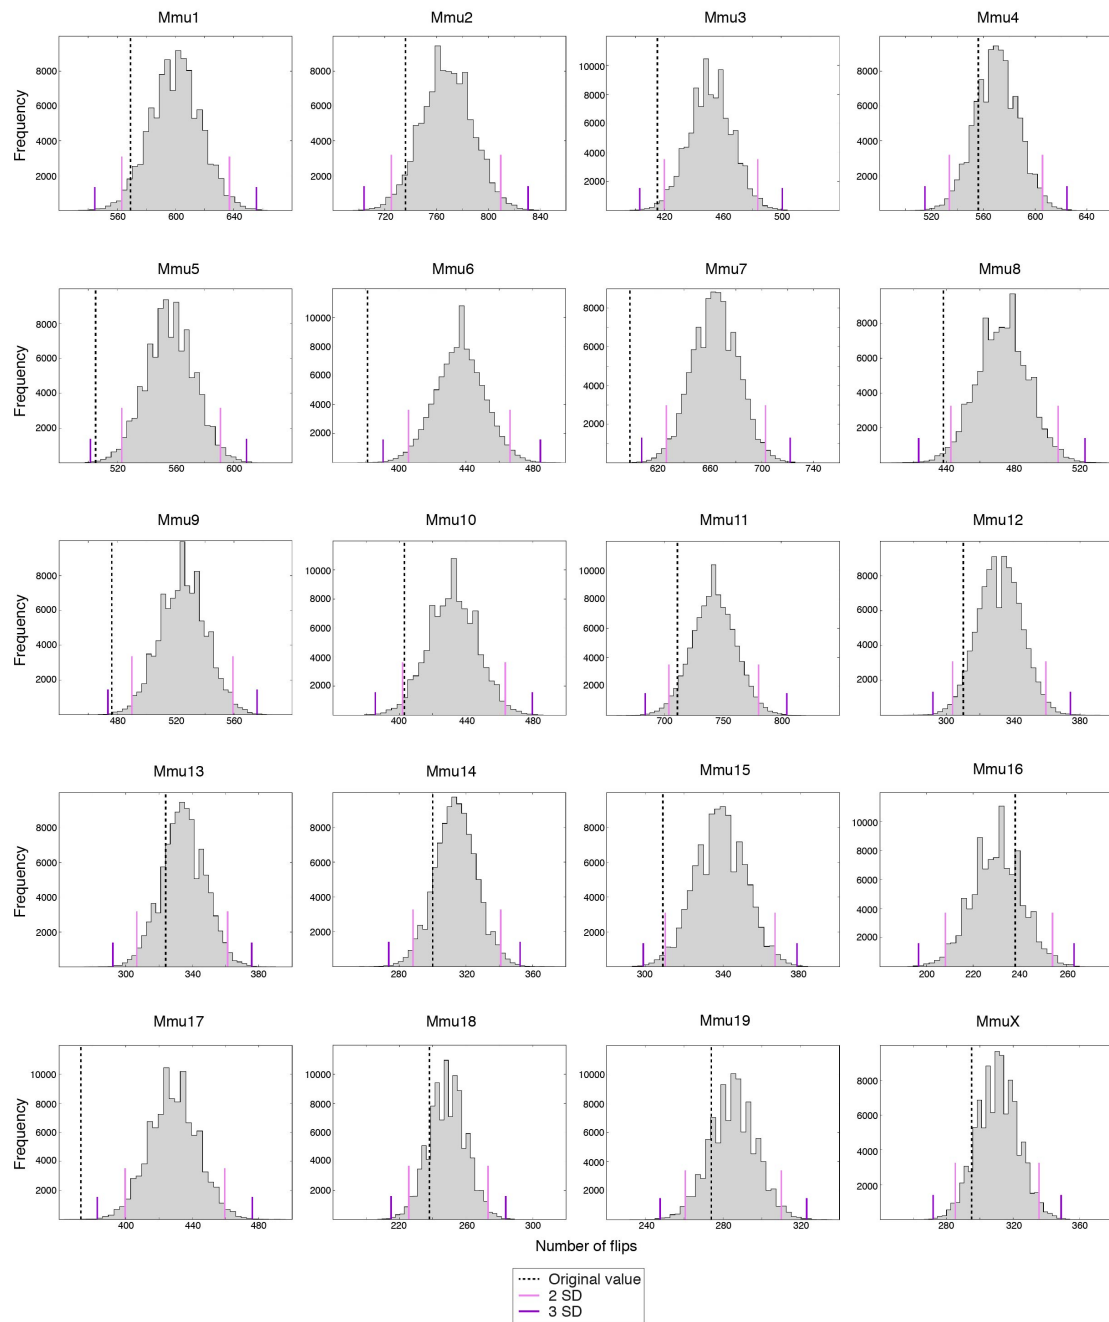

**Supplementary Figure 8.** Distribution of flips in gene expression in Dp1Tyb hippocampus. Plots of distribution of numbers of flips in gene expression in 100,000 randomised versions of each chromosome in Dp1Tyb v WT hippocampus. Pink and purple lines indicate 2 and 3 SD away from the mean; dashed line shows the flips for the actual non-randomised chromosome. Genes on Mmu16 that are duplicated in Dp1Tyb mice were excluded from this analysis.

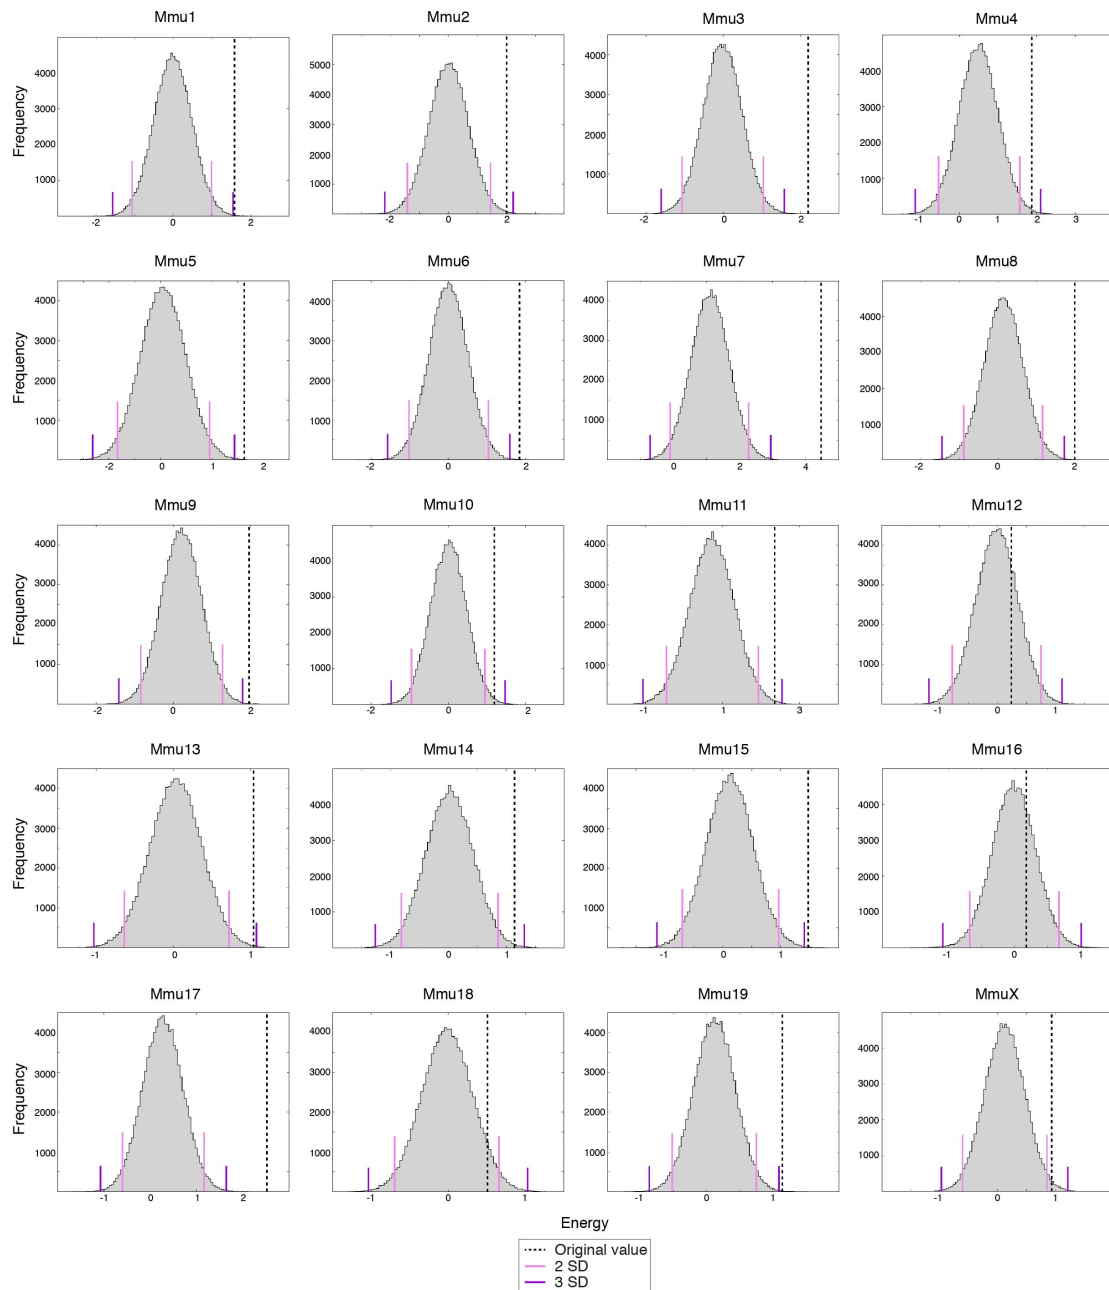

**Supplementary Figure 9.** Distribution of energy in gene expression in Dp1Tyb hippocampus. Plots of distribution of energy in gene expression in 100,000 randomised versions of each chromosome in Dp1Tyb v WT hippocampus. Pink and purple lines indicate 2 and 3 SD away from the mean; dashed line shows the energy for the actual non-randomised chromosome. Genes on Mmu16 that are duplicated in Dp1Tyb mice were excluded from this analysis.

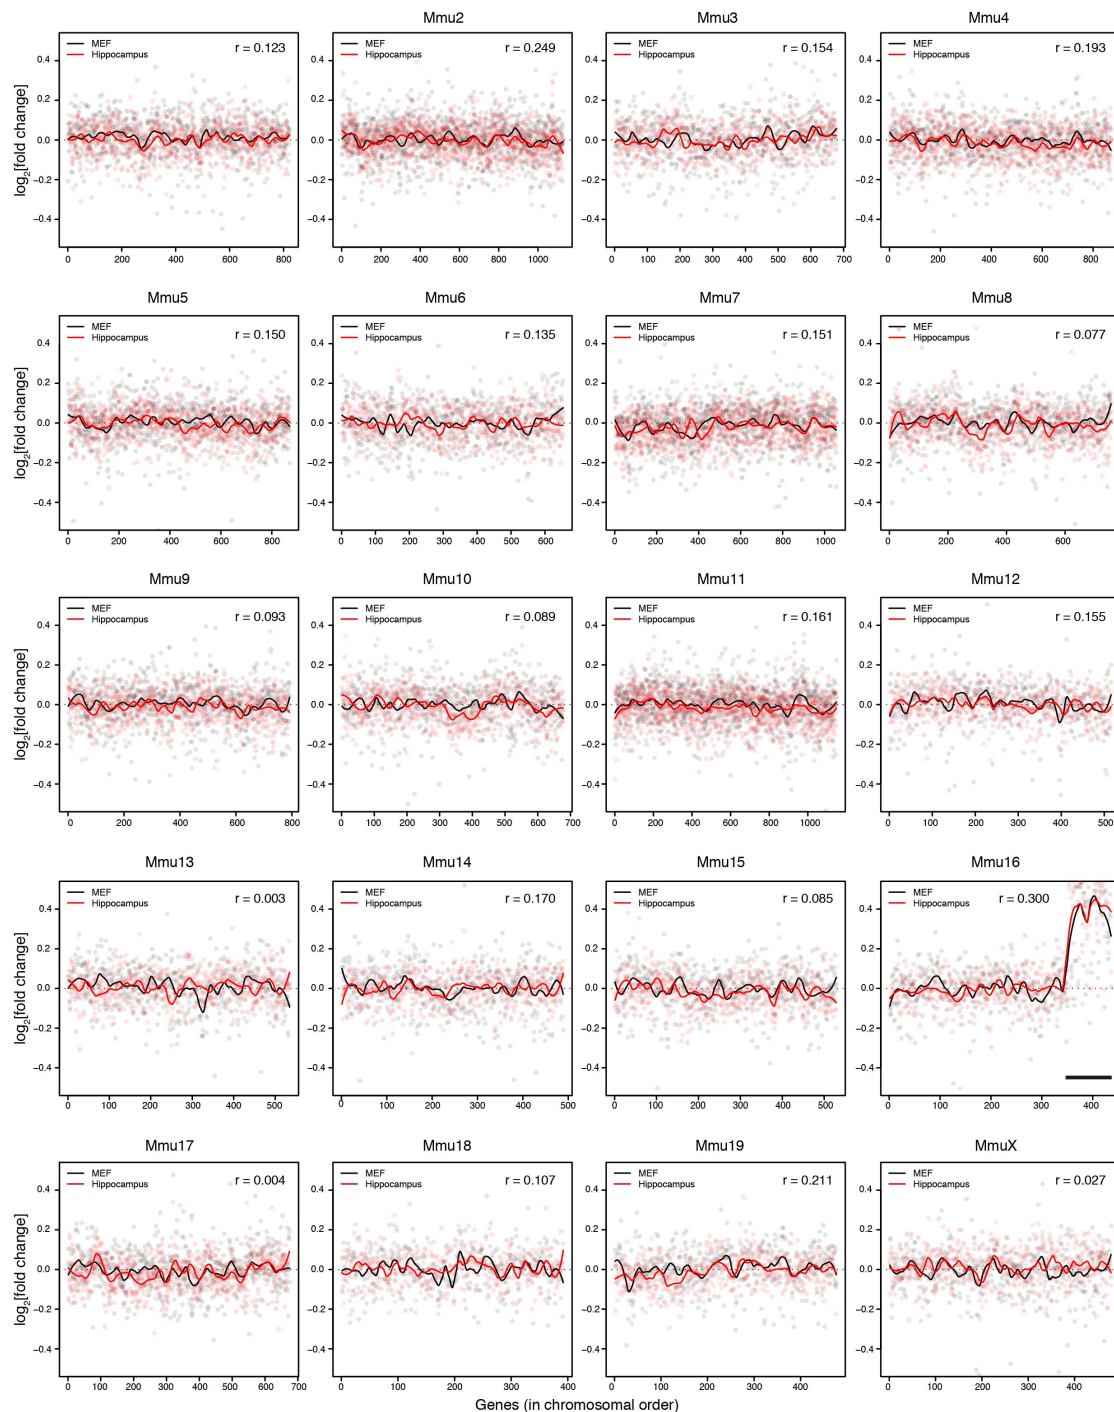

**Supplementary Figure 10.** Little correlation in gene expression changes between Dp1Tyb MEFs and hippocampus. Plots show fold change of gene expression in Dp1Tyb v WT MEFs and hippocampus. Expressed genes in MEFs (grey) and hippocampus (red) are plotted in chromosomal order. Loess smoothing curves for both MEFs (black) and hippocampus (red) are superimposed. The most obvious concordant gene expression changes are the upregulation of genes in the duplicated region on Mmu16 (thick black line). Correlation coefficient  $r$  is indicated for each chromosome. The duplicated region on Mmu16 was not included in the correlation calculation.

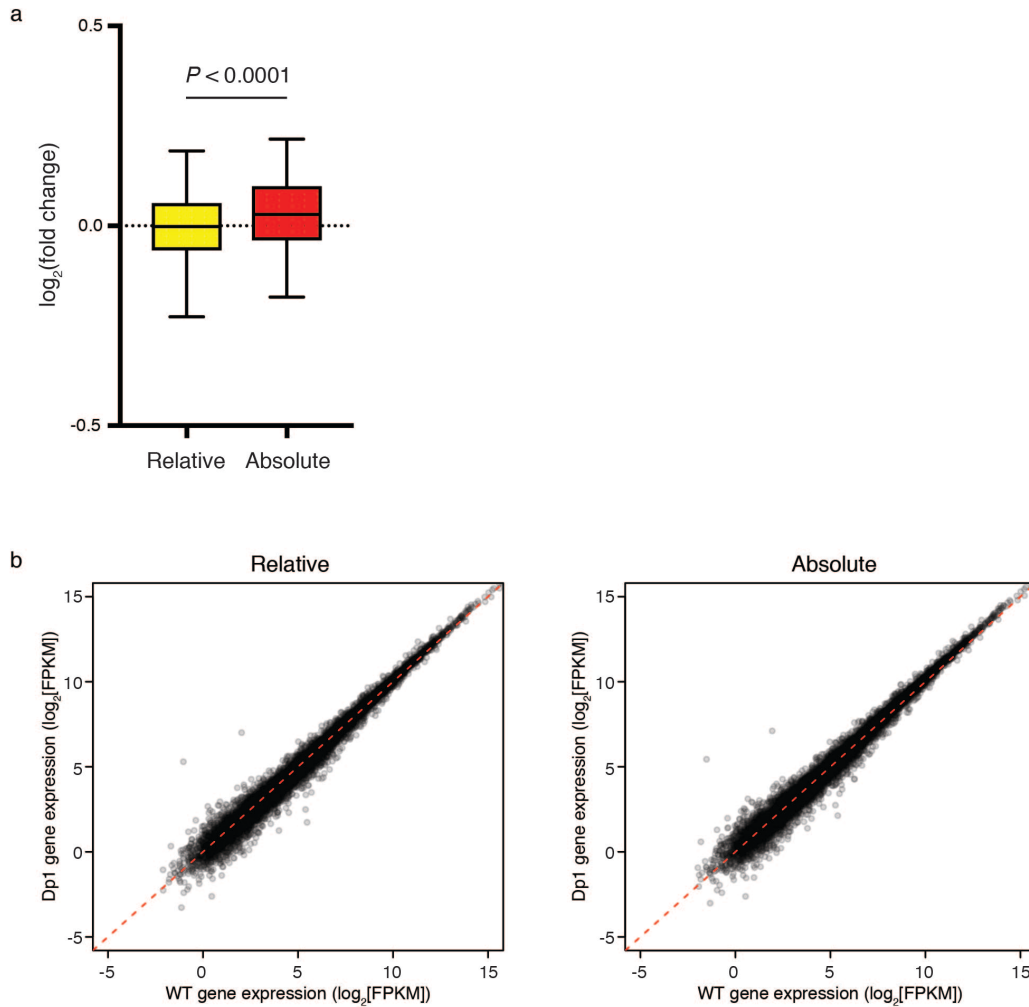

**Supplementary Figure 11.** Small increase in mRNA levels in Dp1Tyb MEFs compared to WT MEFs. **a** Box (25%-75%) and whiskers (5%-95%) plots of fold change in gene expression between Dp1Tyb and WT MEFs quantitated using either a relative normalisation to median gene expression or an absolute normalisation to spike-in control RNAs. A  $\sim 1.8\%$  increase of fold changes in the absolute normalisation compared to relative normalisation indicates a small increase in mRNA levels in Dp1Tyb MEFs compared to WT MEFs. **b** Plots of gene expression in Dp1Tyb and WT MEFs calculated using relative or absolute normalisation. Each dot is a single gene. No evidence of a preferential increase in RNA levels for lower expressed genes. Dashed red line indicates equivalent expression between genotypes;  $P$  value from unpaired t-test.

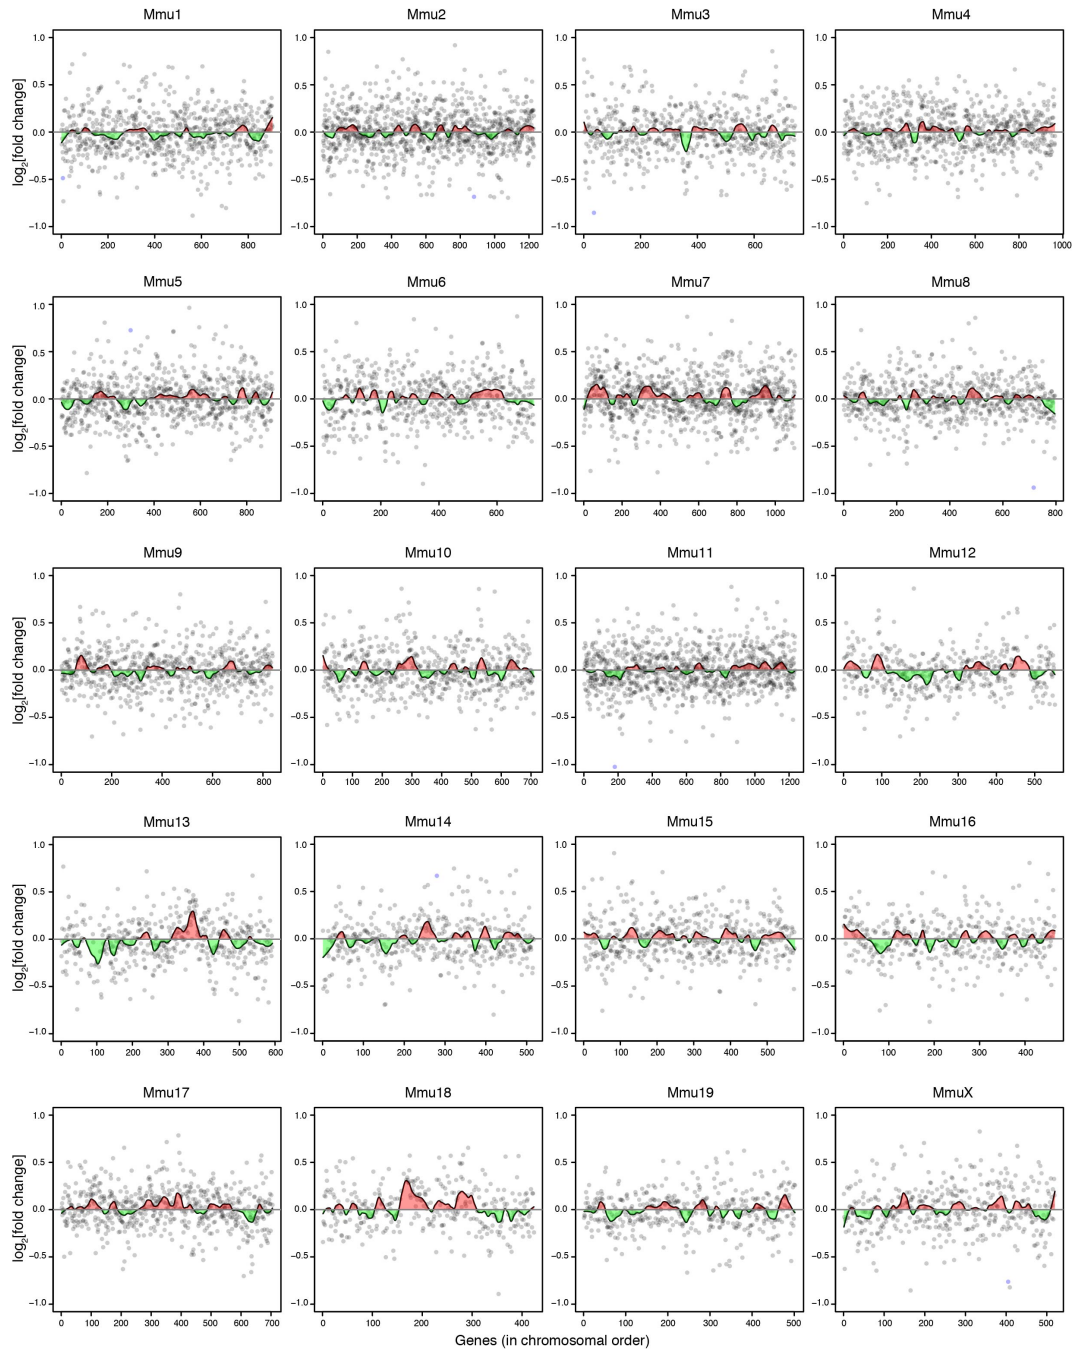

**Supplementary Figure 12.** Fold changes in gene expression from a no genotype difference comparison of 2 WT and 2 Dp1Tyb MEFs v 2 other WT and 2 other Dp1Tyb MEFs. Expressed genes (grey dots) are plotted in chromosomal order. A Loess smoothing curve is superimposed with regions that are apparently up- or down-regulated indicated in red or green.

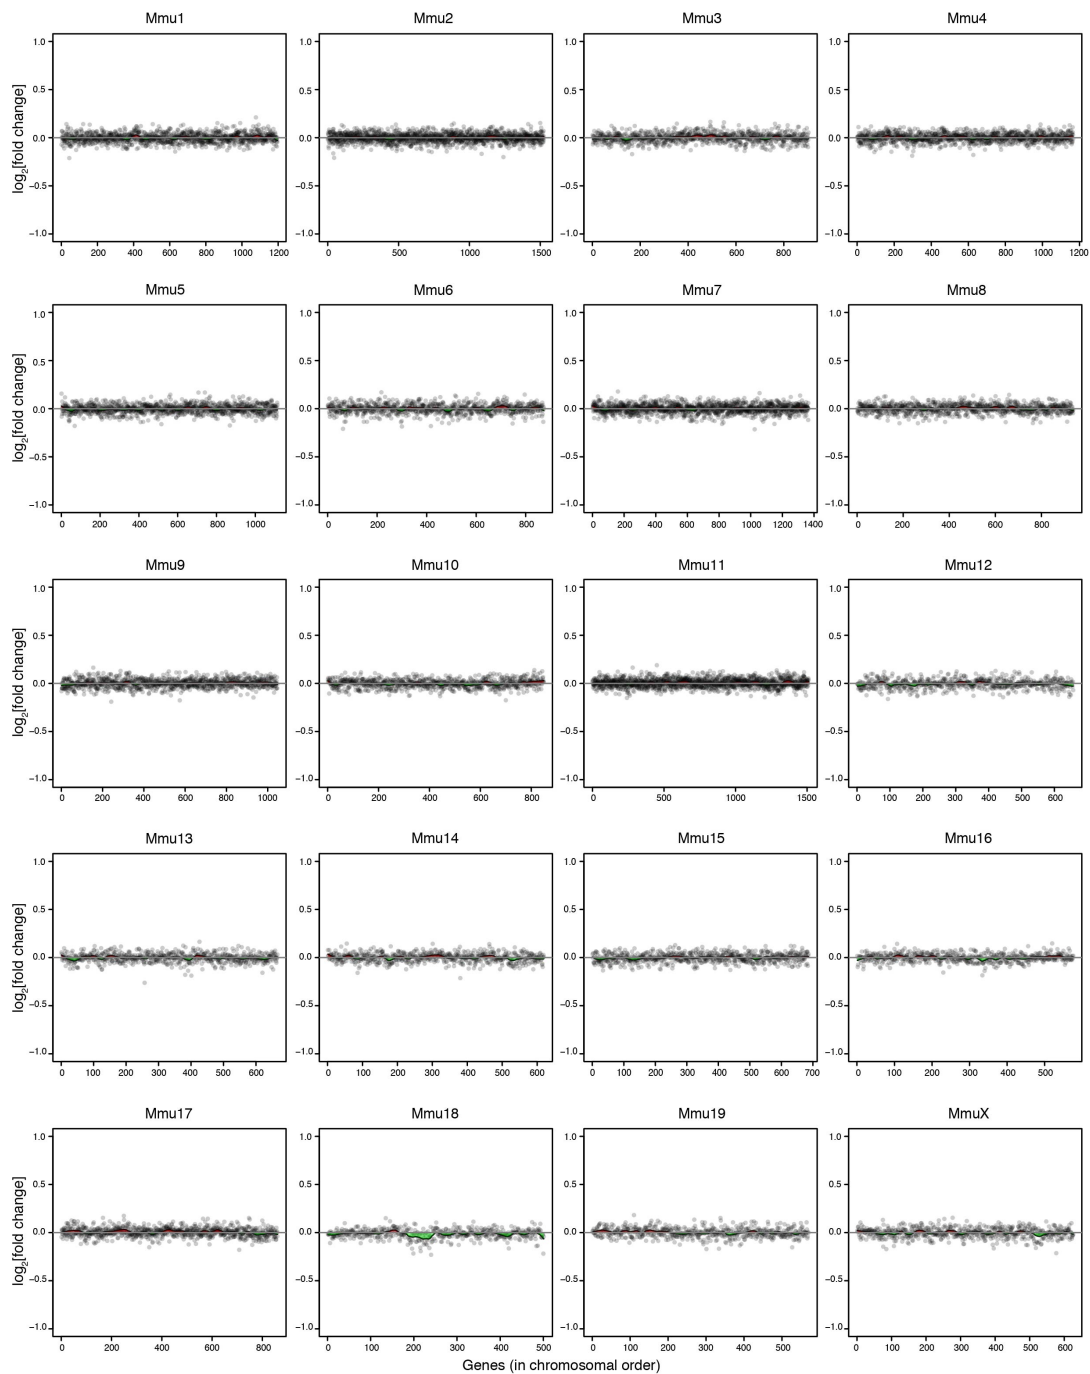

**Supplementary Figure 13.** Fold changes in gene expression from a no genotype difference comparison of 2 WT and 2 Dp1Tyb hippocampi v 2 other WT and 2 other Dp1Tyb hippocampi. Expressed genes (grey dots) are plotted in chromosomal order. A Loess smoothing curve is superimposed with regions that are apparently up- or down-regulated indicated in red or green.

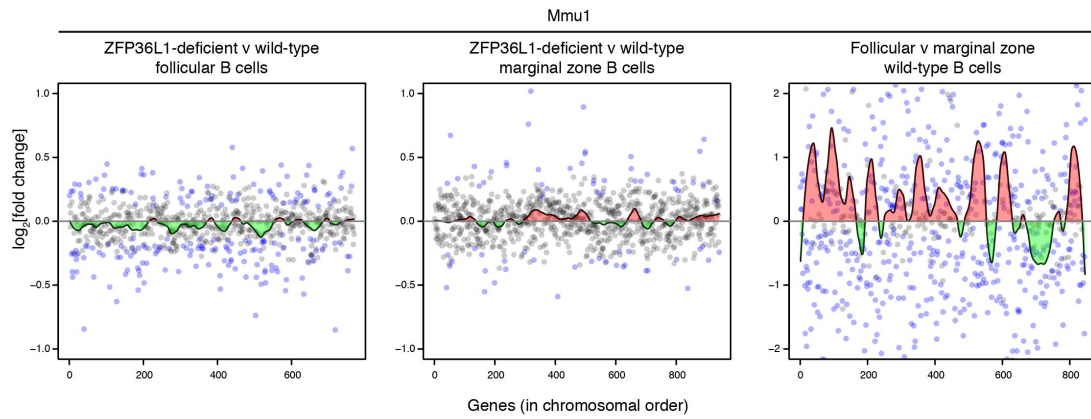

**Supplementary Figure 14.** Clustered changes in gene expression in ZFP36L1-deficient B cells. Plots show fold change of gene expression in ZFP36L1-deficient v WT follicular (left) or marginal zone (middle) B cells or in follicular v marginal zone WT B cells (right). Expressed genes are plotted in chromosomal order on example chromosome Mmu1. Genes that are significantly differentially expressed are indicated with blue dots, other genes are in grey. A Loess smoothing curve is superimposed with regions that are up- or down-regulated indicated in red or green.

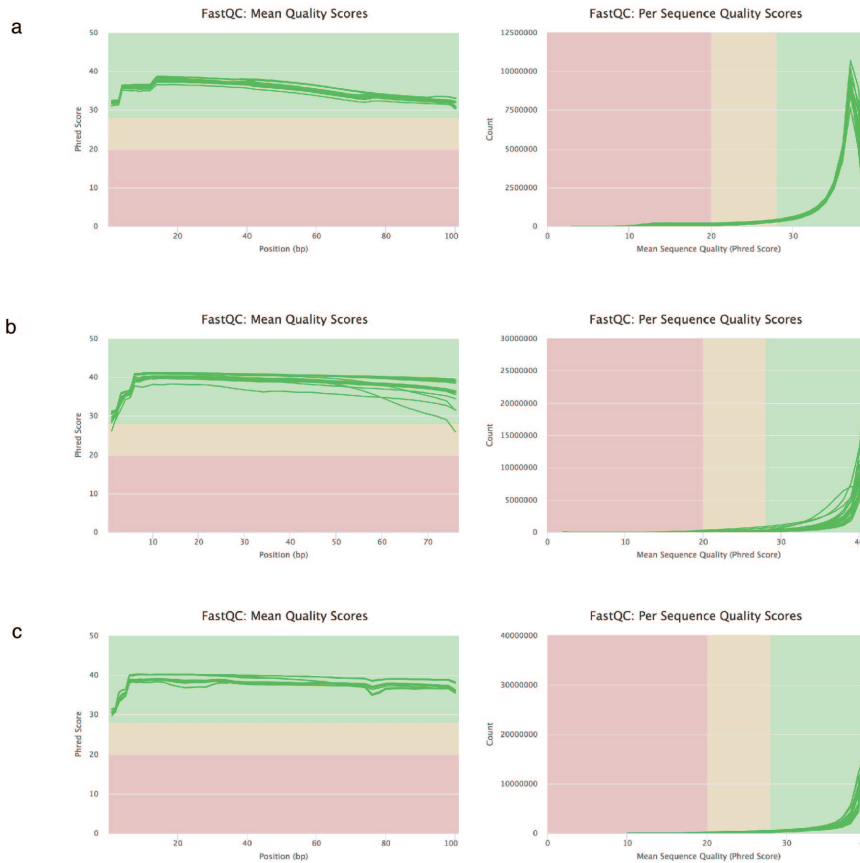

**d**

| Tissue      | Sample ID | Genotype | Left Read Input | Left Read Mapped | Right Read Input | Right Read Mapped | Aligned pairs | Unique and concordant aligned pairs | Percentage unique, concordant and aligned pairs |
|-------------|-----------|----------|-----------------|------------------|------------------|-------------------|---------------|-------------------------------------|-------------------------------------------------|
| MEF         | WT1       | WT       | 34822788        | 32594609         | 34822788         | 31407791          | 30495854      | 29497693                            | 84.7%                                           |
| MEF         | WT2       | WT       | 29628026        | 27579745         | 29628026         | 26325226          | 25568426      | 24646416                            | 83.2%                                           |
| MEF         | WT3       | WT       | 29351953        | 27543586         | 29351953         | 25585653          | 24858396      | 23948918                            | 81.6%                                           |
| MEF         | WT4       | WT       | 30081417        | 28074510         | 30081417         | 27426706          | 26579175      | 25628301                            | 85.2%                                           |
| MEF         | DS1       | Dp1Tyb   | 31373357        | 28883928         | 31373357         | 27575048          | 26762403      | 25840555                            | 82.4%                                           |
| MEF         | DS2       | Dp1Tyb   | 29074324        | 27096137         | 29074324         | 26236707          | 25415750      | 24408831                            | 84.0%                                           |
| MEF         | DS3       | Dp1Tyb   | 30237496        | 28390681         | 30237496         | 27282216          | 26434949      | 25531873                            | 84.4%                                           |
| MEF         | DS4       | Dp1Tyb   | 28608722        | 26693908         | 28608722         | 26195098          | 25364582      | 24516383                            | 85.7%                                           |
| MEF         | DS5       | Dp1Tyb   | 30371585        | 28187621         | 30371585         | 27221549          | 26356675      | 25412260                            | 83.7%                                           |
| Hippocampus | WT1       | WT       | 39689545        | 38387652         | 39689545         | 37423780          | 36805799      | 35160333                            | 88.6%                                           |
| Hippocampus | WT2       | WT       | 30198192        | 29250904         | 30198192         | 28398579          | 27958215      | 26716770                            | 88.5%                                           |
| Hippocampus | WT3       | WT       | 22639804        | 21974080         | 22639804         | 21336436          | 20995150      | 20138060                            | 88.9%                                           |
| Hippocampus | WT4       | WT       | 40974702        | 39657860         | 40974702         | 38828529          | 38087667      | 36507023                            | 89.1%                                           |
| Hippocampus | WT5       | WT       | 26611304        | 25865150         | 26611304         | 25197222          | 24808447      | 23828555                            | 89.5%                                           |
| Hippocampus | Dp1Tyb1   | Dp1Tyb   | 54473971        | 52921327         | 54473971         | 50853761          | 50081350      | 47541562                            | 87.3%                                           |
| Hippocampus | Dp1Tyb2   | Dp1Tyb   | 35304783        | 34380965         | 35304783         | 33343314          | 32858997      | 31411930                            | 89.0%                                           |
| Hippocampus | Dp1Tyb3   | Dp1Tyb   | 31490822        | 30535726         | 31490822         | 29878090          | 29383513      | 28155448                            | 89.4%                                           |
| Hippocampus | Dp1Tyb4   | Dp1Tyb   | 41956679        | 39876560         | 41956679         | 37337037          | 36107566      | 33839611                            | 80.7%                                           |
| Hippocampus | Dp1Tyb5   | Dp1Tyb   | 27418065        | 26354075         | 27418065         | 25750723          | 25251537      | 24313625                            | 88.7%                                           |
| MEF + ERCC  | WT1       | WT       | 44869441        | 35508000         | 44869441         | 33650965          | 32816193      | 30440901                            | 67.8%                                           |
| MEF + ERCC  | WT2       | WT       | 48568737        | 37550241         | 48568737         | 35842934          | 34890030      | 32300838                            | 66.5%                                           |
| MEF + ERCC  | WT3       | WT       | 42579728        | 34286823         | 42579728         | 32007386          | 31307939      | 29293097                            | 68.8%                                           |
| MEF + ERCC  | WT4       | WT       | 42310301        | 33588000         | 42310301         | 32025085          | 31174607      | 29125301                            | 68.8%                                           |
| MEF + ERCC  | Dp1_1     | Dp1Tyb   | 49688237        | 40354237         | 49688237         | 38506395          | 37645316      | 35103198                            | 70.6%                                           |
| MEF + ERCC  | Dp1_2     | Dp1Tyb   | 33309697        | 26388175         | 33309697         | 25156321          | 24490900      | 22266870                            | 66.8%                                           |
| MEF + ERCC  | Dp1_3     | Dp1Tyb   | 39139347        | 31669737         | 39139347         | 30364906          | 29664182      | 27616797                            | 70.6%                                           |
| MEF + ERCC  | Dp1_4     | Dp1Tyb   | 36409275        | 28155570         | 36409275         | 26660188          | 26042928      | 24321618                            | 66.8%                                           |

**Supplementary Figure 15.** Details of RNAseq experiments. **a, b, c** Mean phred quality scores as a function of position in the sequence and mean quality scores per sequence for RNAseq samples from MEFs (a), hippocampus (b) and MEFs with ERCC spike-ins (c). **d** Table showing data for all RNAseq samples from MEFs, hippocampus and MEFs with ERCC spike-ins listing numbers of left and right reads, mapped reads, and aligned pairs, as well as numbers and percentages of unique, concordant and aligned pairs.
