# Supplementary material for: Gene expression dysregulation domains are not a specific feature of Down syndrome
Source: PubMed Central journal article supplement (PMC6554309; doi:10.1038/s41467-019-10129-9), 2019-06-06
Supplement: 41467_2019_10129_MOESM3_ESM.pdf [file 41467_2019_10129_MOESM3_ESM.pdf]

## Description of Additional Supplementary Files

**File name:** Supplementary Data 1

**Description:** Differential gene expression analysis between Dp1Tyb and WT MEFs. For each gene, the table shows the mean expression, fold change (Dp1Tyb v WT), p-value and p-value adjusted for multiple testing (padj).

**File name:** Supplementary Data 2

**Description:** Differential gene expression analysis between Dp1Tyb and WT hippocampus. For each gene, the table shows the mean expression, fold change (Dp1Tyb v WT), p-value and p-value adjusted for multiple testing (padj).
